# Supplementary material for: Spirobisnaphthalenes from the Mangrove-Derived Fungus Rhytidhysteron sp. AS21B
Source: PubMed Central journal article supplement (PMC3967209; doi:10.3390/md12031271), 2014-03-06

## Supplementary Information

**Figure S1.**  $^1\text{H}$  NMR Spectrum of Rhytidone A (**1**) in  $\text{DMSO-}d_6$ .

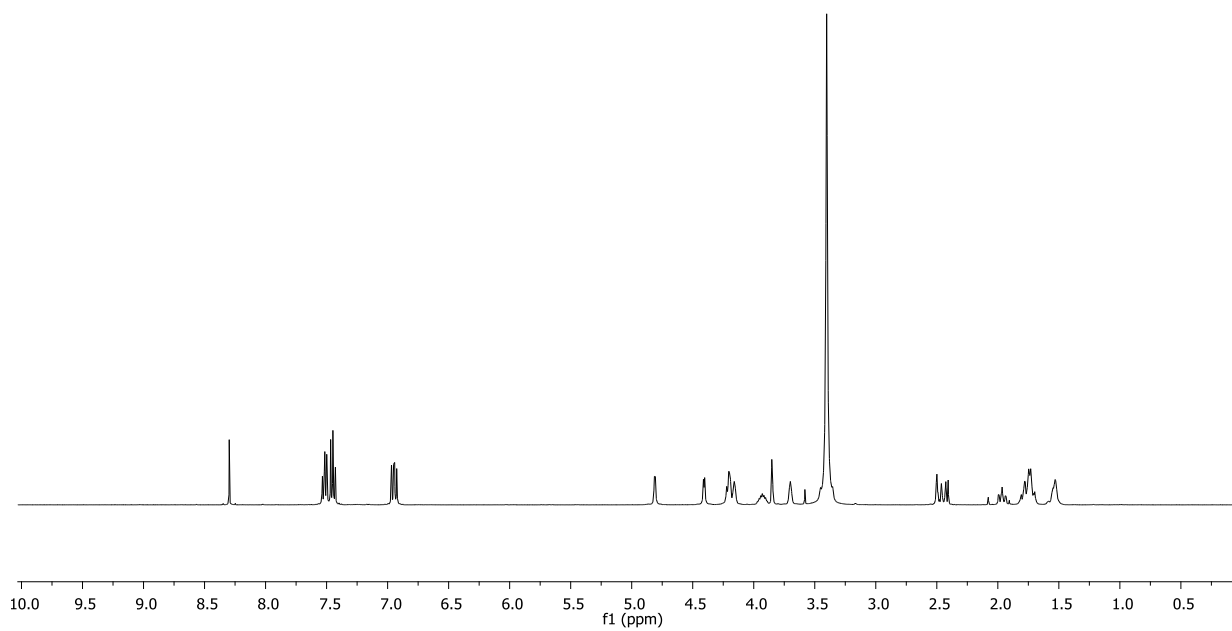

**Figure S2.**  $^{13}\text{C}$  NMR Spectrum of Rhytidone A (**1**) in  $\text{DMSO-}d_6$ .

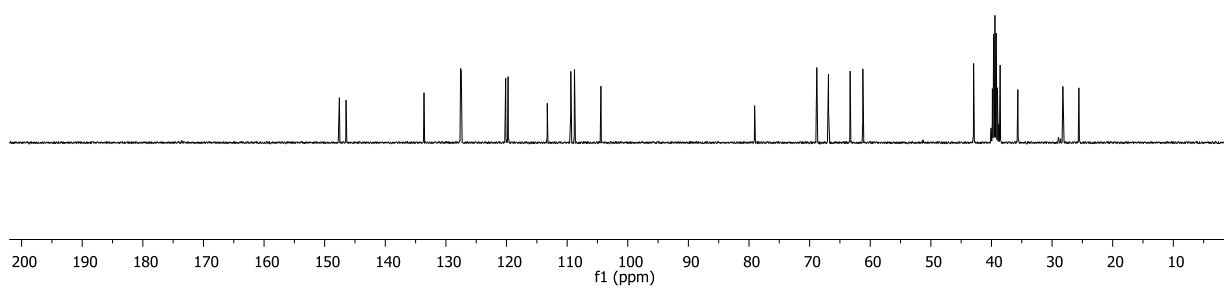

**Figure S3.**  $^1\text{H}$ - $^1\text{H}$  COSY Spectrum of Rhytidone A (1) in  $\text{DMSO-}d_6$ .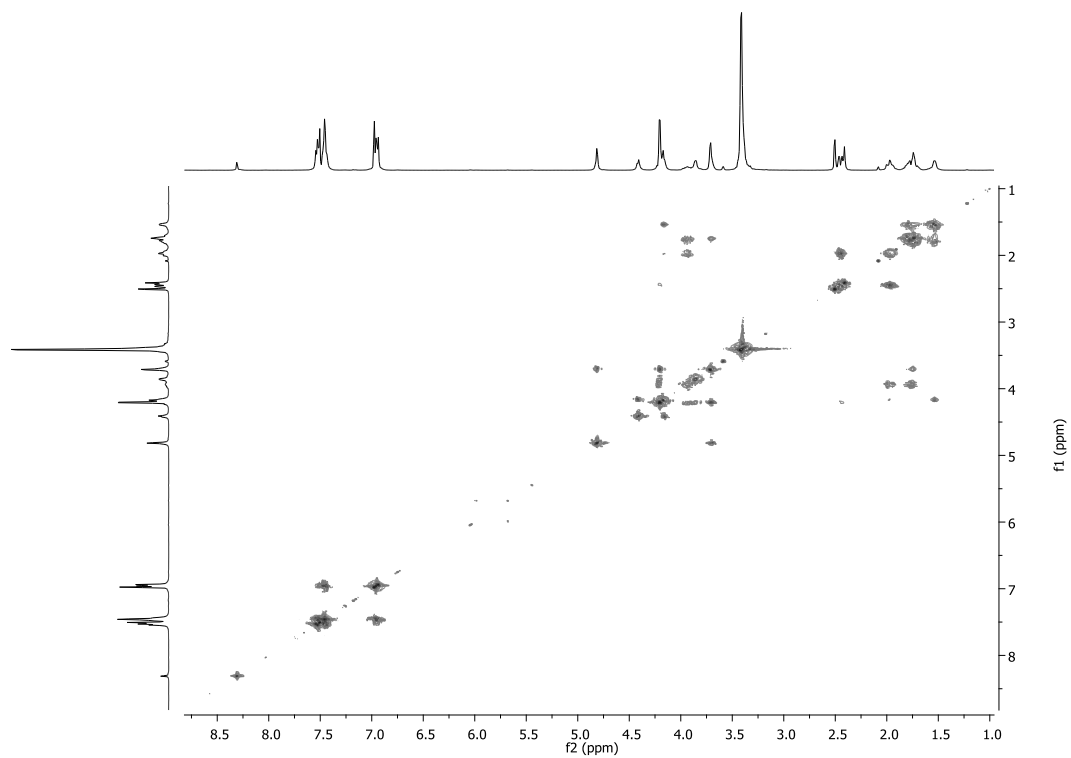**Figure S4.** HSQC Spectrum of Rhytidone A (1) in  $\text{DMSO-}d_6$ .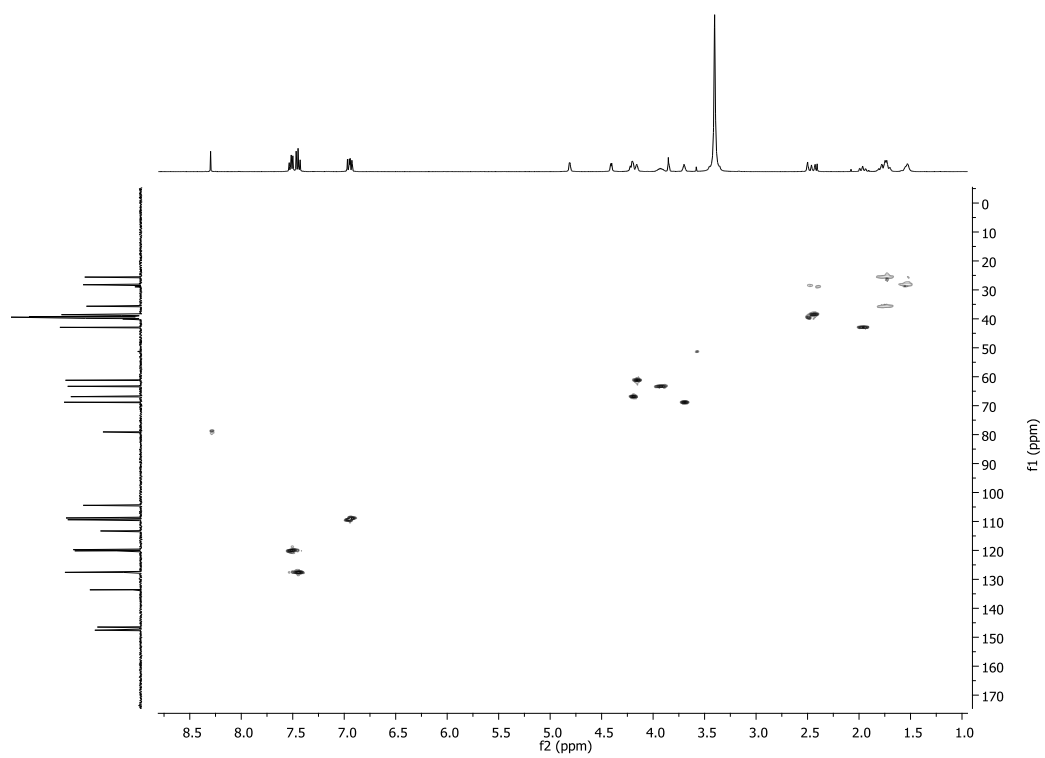

**Figure S5.** HMBC Spectrum of Rhytidone A (1) in DMSO- $d_6$ .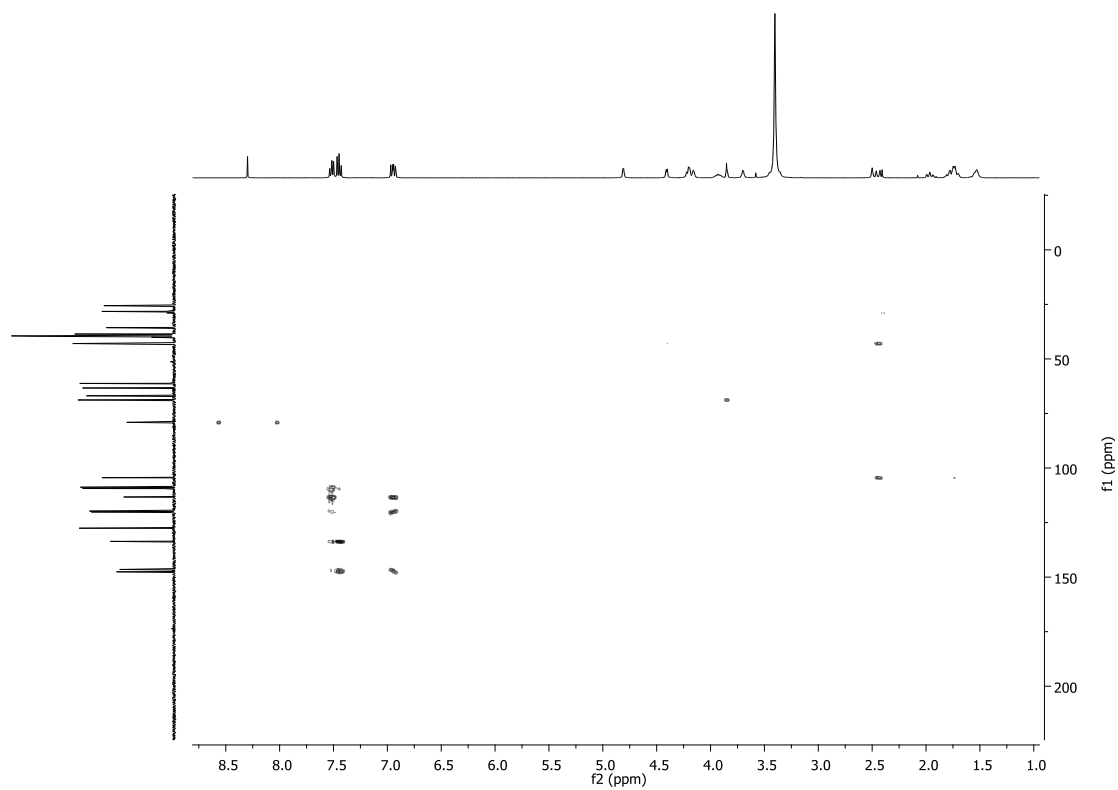**Figure S6.**  $^1\text{H}$  NMR Spectrum of Compound 1a in  $\text{CDCl}_3$ .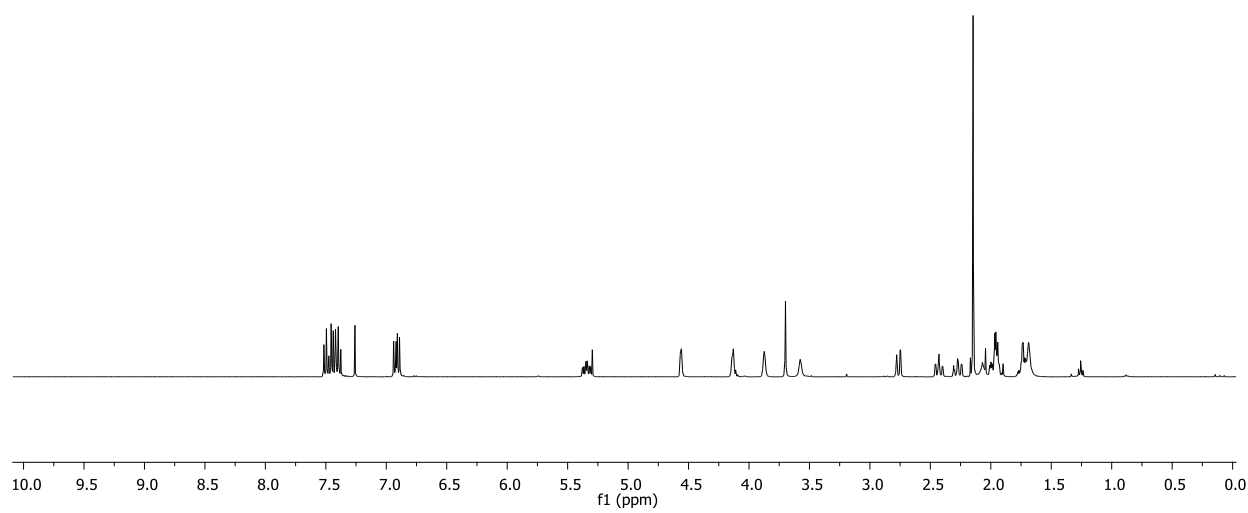

**Figure S7.**  $^{13}\text{C}$  NMR Spectrum of Compound **1a** in  $\text{CDCl}_3$ .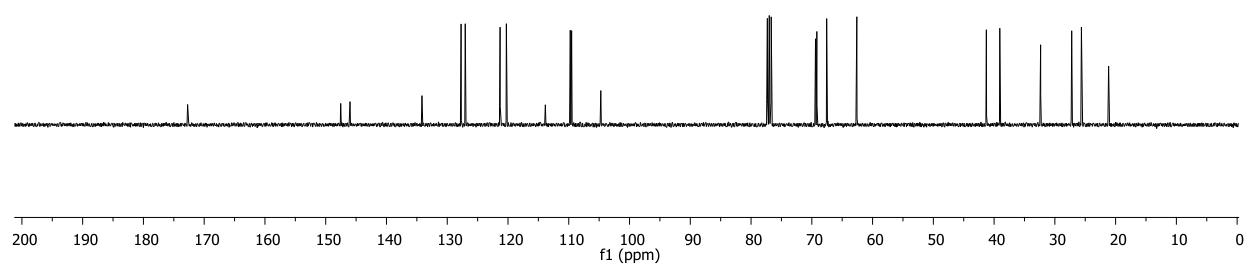**Figure S8.**  $^1\text{H}$ - $^1\text{H}$  COSY Spectrum of Compound **1a** in  $\text{CDCl}_3$ .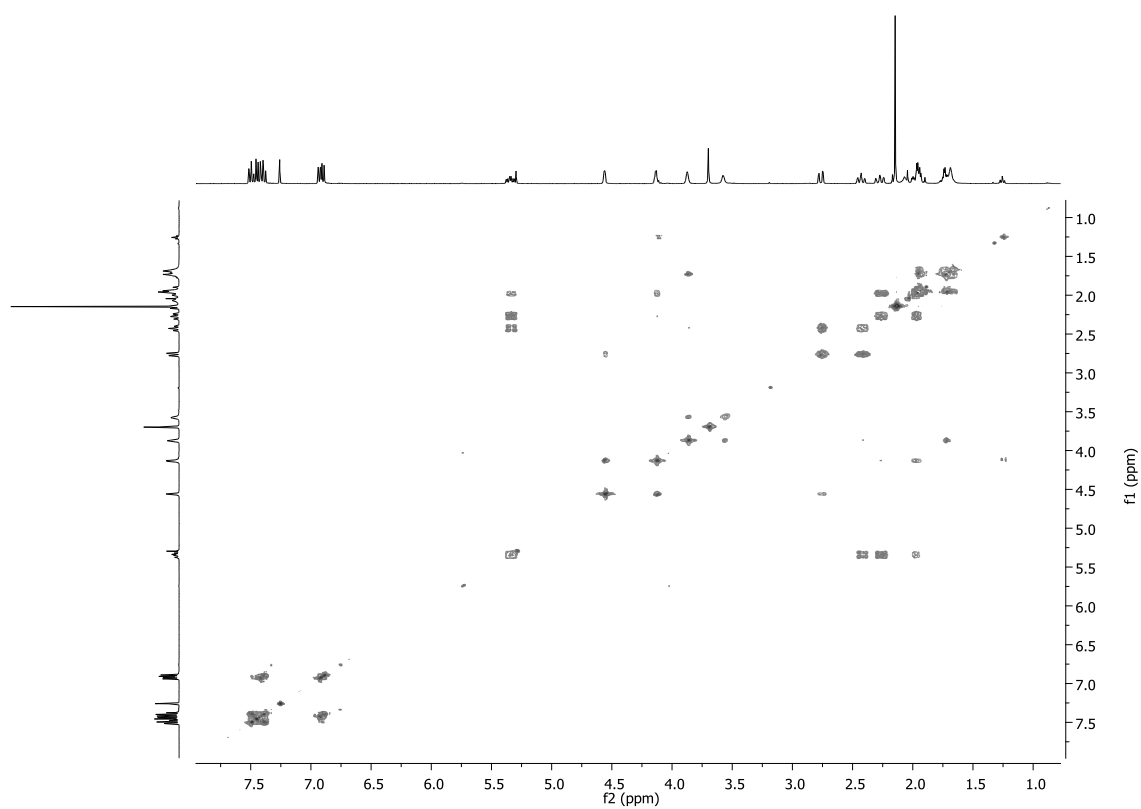

Figure S9. HSQC Spectrum of Compound 1a in CDCl<sub>3</sub>.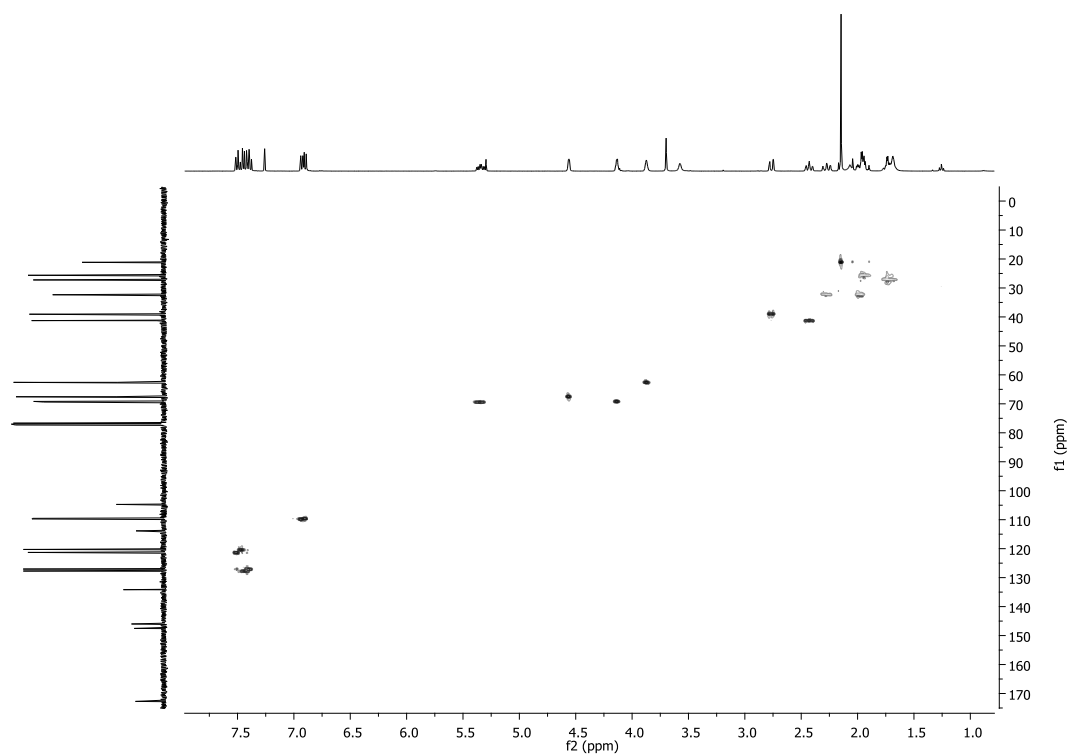Figure S10. HMBC Spectrum of Compound 1a in CDCl<sub>3</sub>.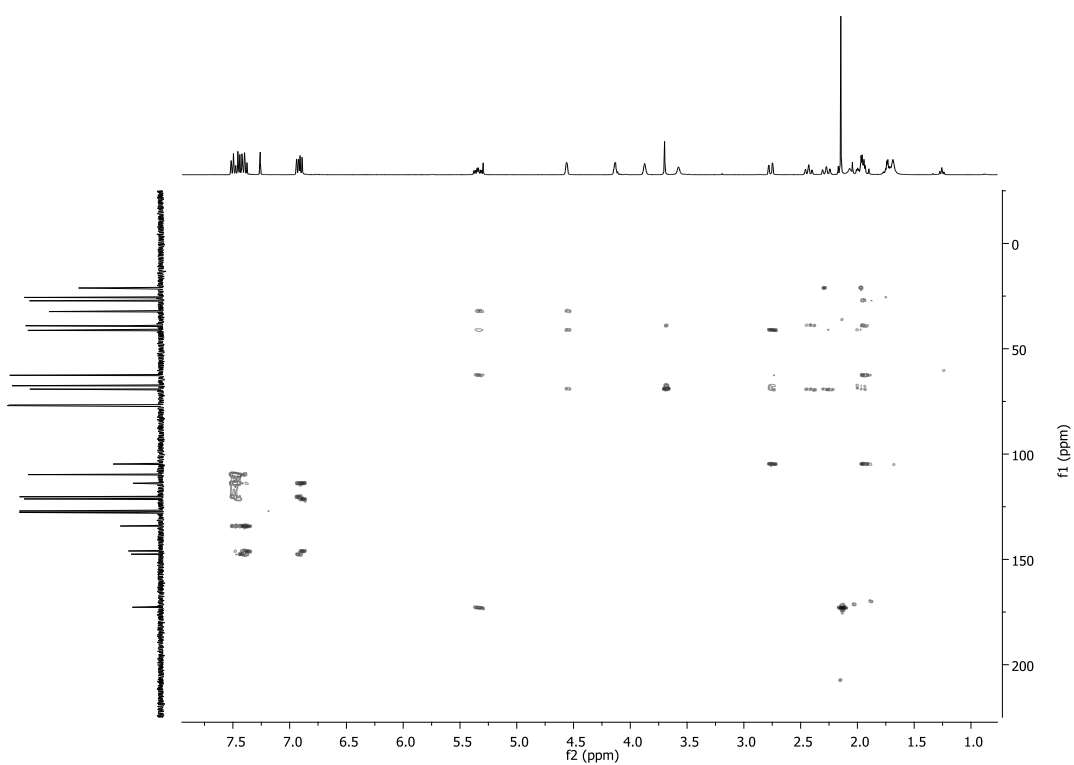

**Figure S11.**  $^1\text{H}$  NMR Spectrum of Rhytidone B (2) in  $\text{CDCl}_3$ .

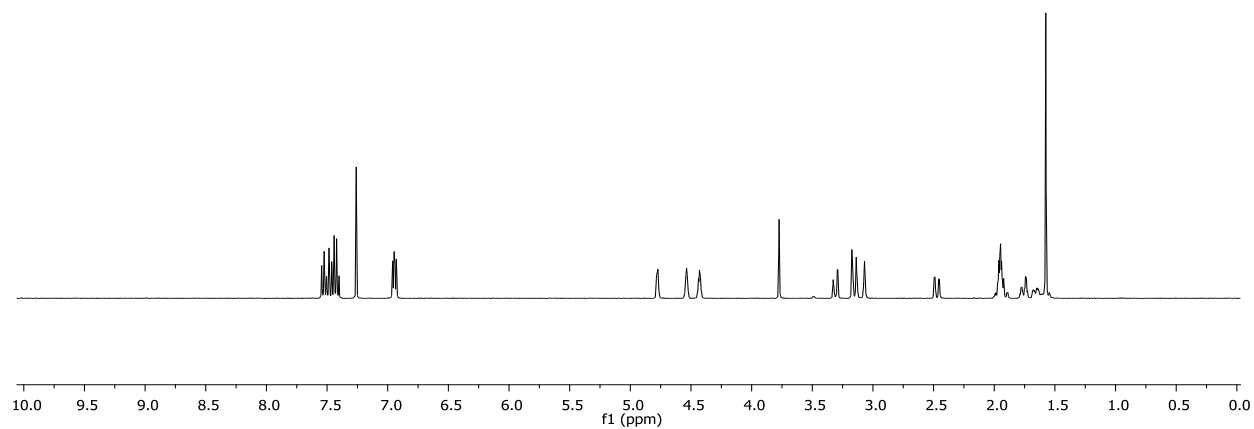

**Figure S12.**  $^{13}\text{C}$  NMR Spectrum of Rhytidone B (2) in  $\text{CDCl}_3$ .

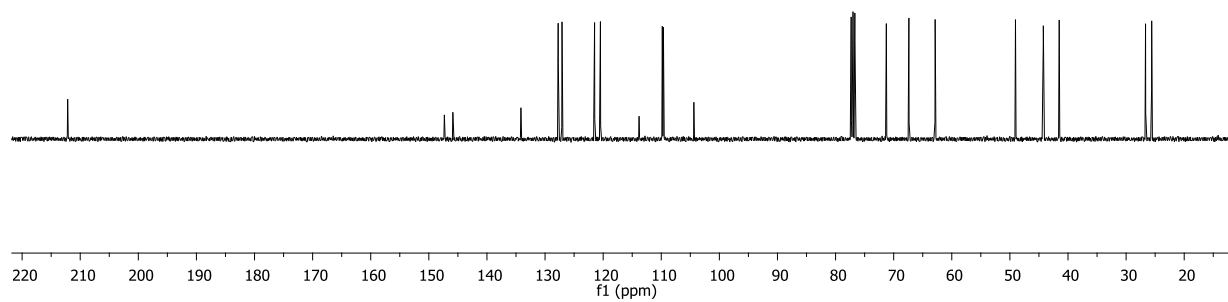

**Figure S13.**  $^1\text{H}$ - $^1\text{H}$  COSY Spectrum of Rhytidone B (2) in  $\text{CDCl}_3$ .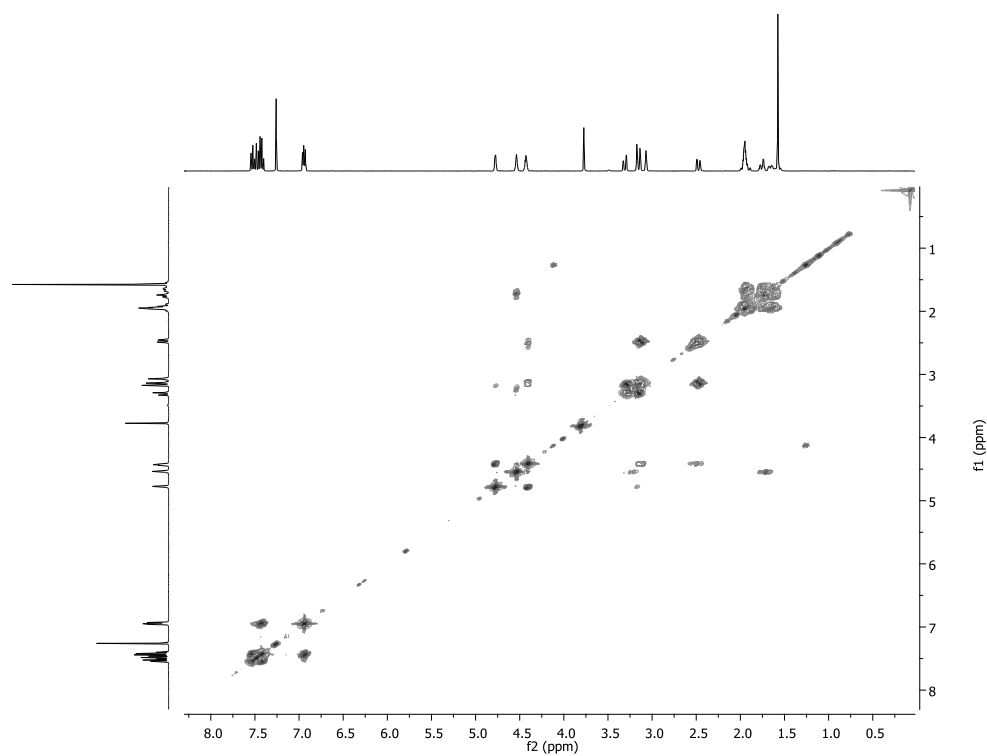**Figure S14.** HSQC Spectrum of Rhytidone B (2) in  $\text{CDCl}_3$ .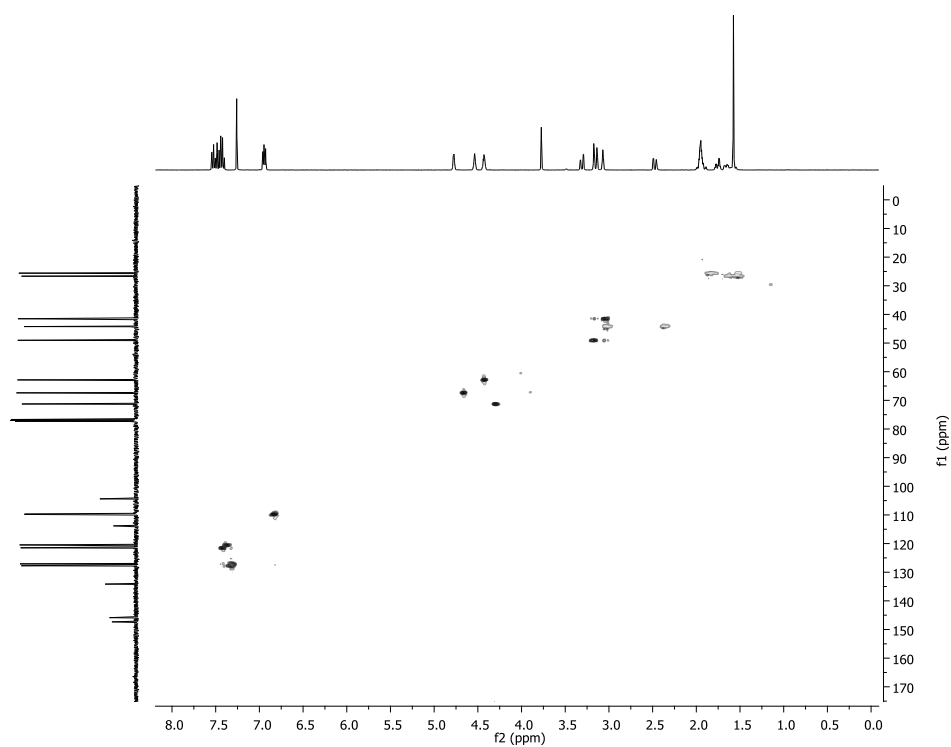

**Figure S15.** HMBC Spectrum of Rhytidone B (2) in CDCl<sub>3</sub>.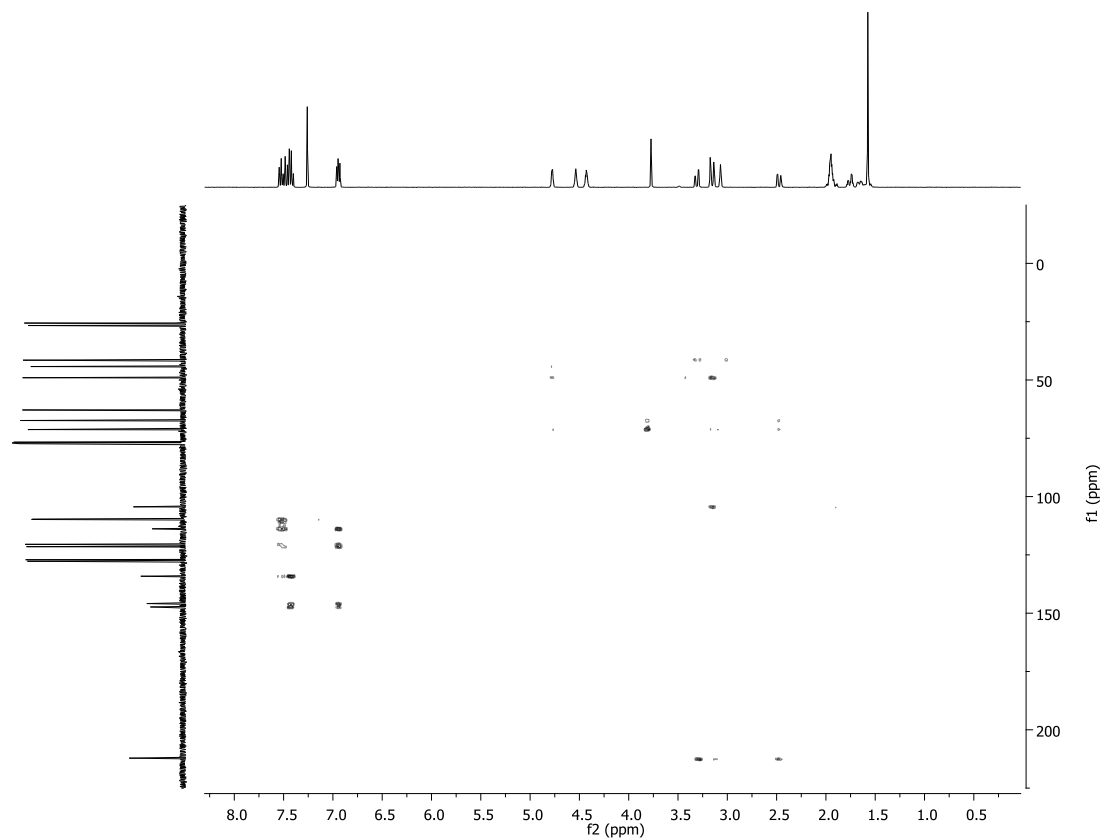**Figure S16.** <sup>1</sup>H NMR Spectrum of Rhytidone C (3) in CDCl<sub>3</sub>.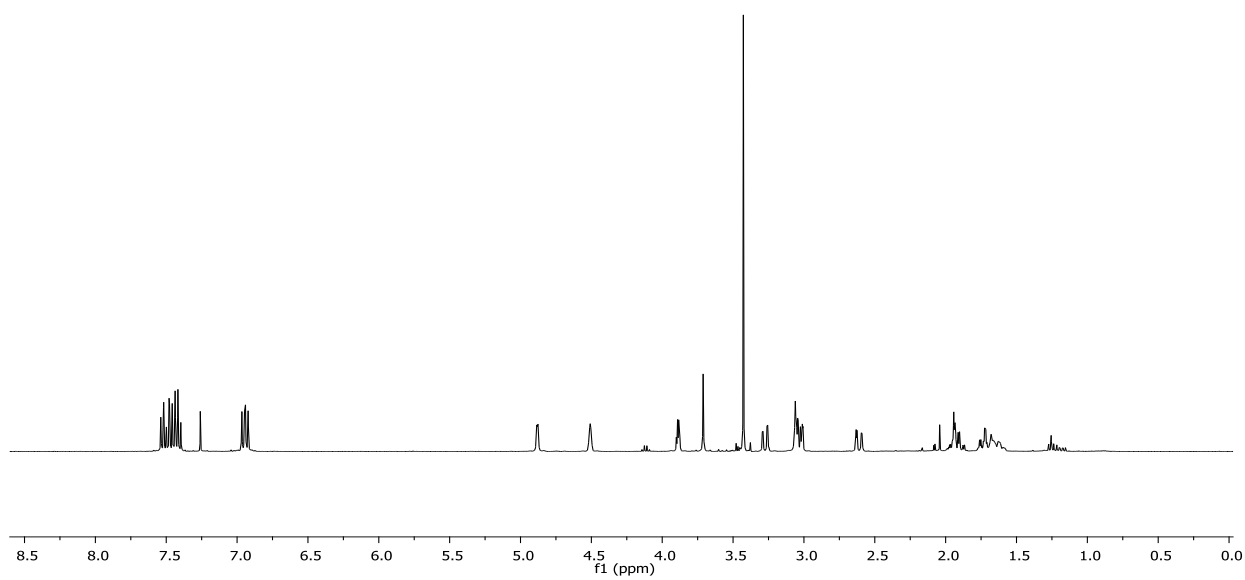



**Figure S17.**  $^{13}\text{C}$  NMR Spectrum of Rhytidone C (**3**) in  $\text{CDCl}_3$ .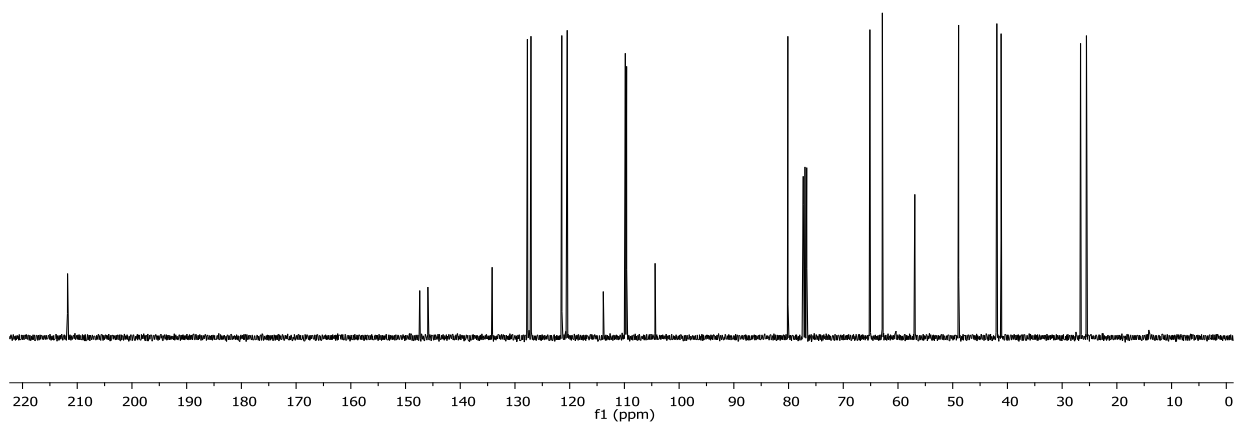**Figure S18.**  $^1\text{H}$ - $^1\text{H}$  COSY Spectrum of Rhytidone C (**3**) in  $\text{CDCl}_3$ .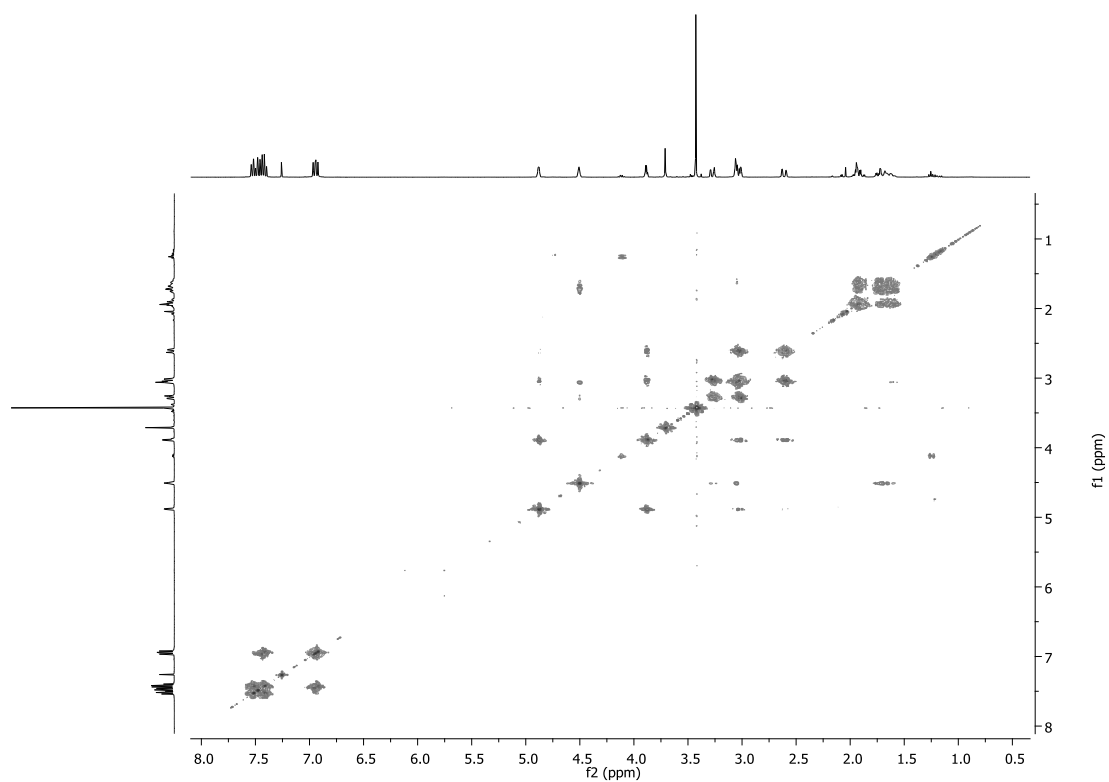

**Figure S19.** HSQC Spectrum of Rhytidone C (**3**) in CDCl<sub>3</sub>.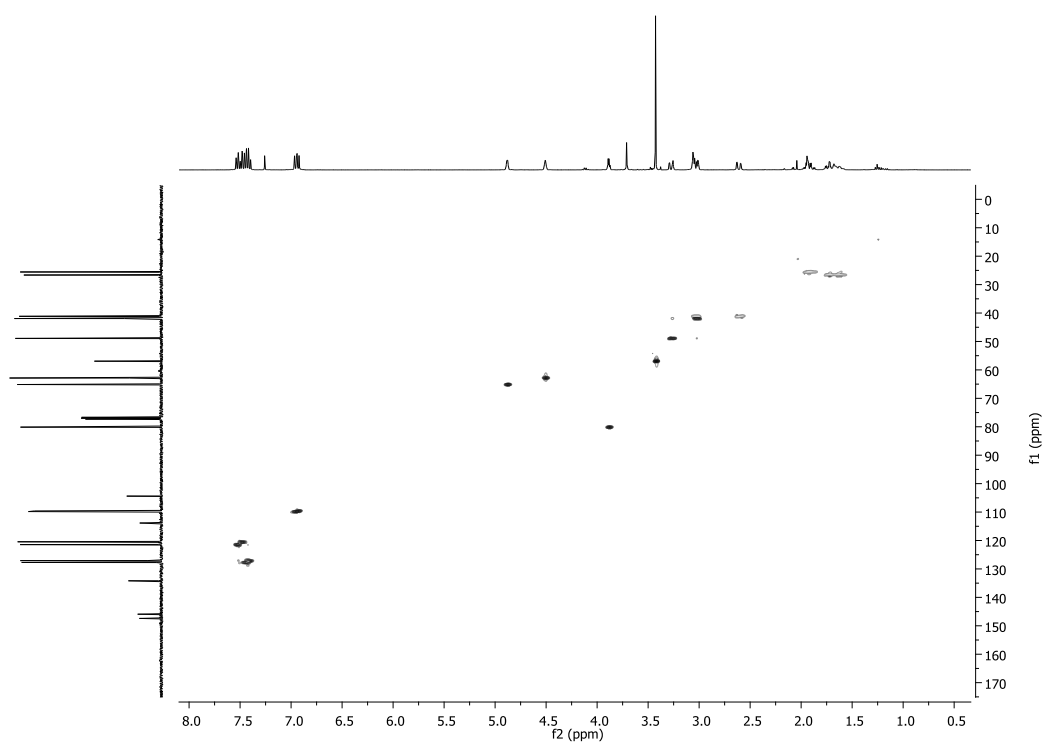**Figure S20.** HMBC Spectrum of Rhytidone C (**3**) in CDCl<sub>3</sub>.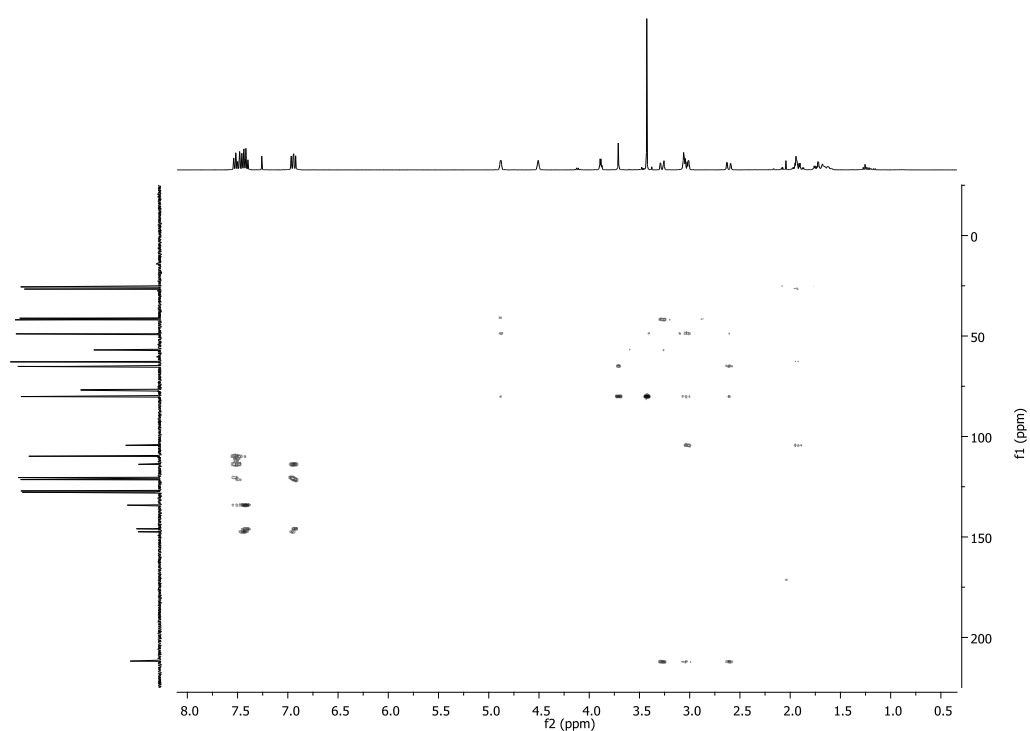

Supplement: marinedrugs-12-01271-s001.pdf [file marinedrugs-12-01271-s001.pdf]
